# Supplementary material for: Distinct Particle Films Impacts on Olive Leaf Optical Properties and Plant Physiology
Source: MDPI journal article supplement (doi:10.3390/foods10061291), 2021-06-04
Supplement: s1 [file s1]

**Supplementary table S1.**

**Supplementary table 1.** Mineralogical composition (XRPD Rietveld-RIR method) of the kaolin and CHA-zeolitite supplied by Balco s.p.a and used in the experimentation. Data from the product's technical sheet supplied by the company

| Mineralogical composition (%) | Kaolin | CHA-zeolitite |
|-------------------------------|--------|---------------|
| Kaolinite                     | 87     | 0             |
| Quartz                        | 3      | 0             |
| Muscovite                     | 4      | 0             |
| Chabazite                     | 0      | 65            |
| Phillipsite                   | 0      | 3             |
| K-feldspar                    | 0      | 5             |
| Biotite                       | 0      | 2             |
| Pyroxene                      | 0      | 3             |
| Volcanic glass                | 0      | 22            |
| Others                        | 6      | 0             |
| Total Zeolitic content        | 0      | 68            |

**Supplementary table 2:** Results of soil analysis (oven-combustion, EA-IRMS) from each experimental plant treated with kaolin (K), CHA-zeolitite (Z) and the control (T). SOM is the soil organic matter measured by combustion at 550 °C (mean of 2 replicates), TN and TC are the total nitrogen and carbon content measured by EA analysis,  $\delta^{15}\text{N}$  and  $\delta^{13}\text{C}$  are the isotopic signature expressed as delta notation by IRMS (values are expressed as mean of 3 replicates). Standard deviation within brackets. Same letters express no significant differences ( $p>0.05$ ) as results of ANOVA and TUKEY (HSD) tests.

|                                         | T                          | K                          | Z                          |
|-----------------------------------------|----------------------------|----------------------------|----------------------------|
| %                                       |                            |                            |                            |
| <b>SOM</b>                              | 7.90                       | 8.45                       | 7.95                       |
| <b>TN</b>                               | 0.29 (0.02) <sup>a</sup>   | 0.31 (0.04) <sup>a</sup>   | 0.27 (0.05) <sup>a</sup>   |
| <b>TC</b>                               | 5.11 (0.45) <sup>a</sup>   | 5.06 (0.14) <sup>a</sup>   | 4.93 (0.18) <sup>a</sup>   |
| ‰                                       |                            |                            |                            |
| <b><math>\delta^{15}\text{N}</math></b> | +2.17 (0.77) <sup>a</sup>  | +2.79 (0.62) <sup>a</sup>  | +1.29 (1.28) <sup>a</sup>  |
| <b><math>\delta^{13}\text{C}</math></b> | -17.57 (1.08) <sup>a</sup> | -18.12 (0.37) <sup>a</sup> | -17.31 (1.05) <sup>a</sup> |

**Supplementary table 3:** Results of soil analysis (2 replicates) by X-Ray Fluorescence (XRF) from each experimental plant treated with kaolin (K 1 and 2), CHA-zeolitite (Z 1 and 2) and the control (T 1 and 2). LOI represent the loss on ignition (volatile losses at 1000°C).

|                        | T 1   | T 2   | K 1   | K 2   | Z1    | Z 2   |
|------------------------|-------|-------|-------|-------|-------|-------|
| %                      |       |       |       |       |       |       |
| <b>SiO<sub>2</sub></b> | 50.87 | 53.76 | 52.62 | 52.56 | 50.72 | 51.10 |

|                                    |       |       |       |       |       |       |
|------------------------------------|-------|-------|-------|-------|-------|-------|
| <b>TiO<sub>2</sub></b>             | 0.54  | 0.50  | 0.58  | 0.54  | 0.52  | 0.55  |
| <b>Al<sub>2</sub>O<sub>3</sub></b> | 12.59 | 12.15 | 13.29 | 12.61 | 12.65 | 12.64 |
| <b>Fe<sub>2</sub>O<sub>3</sub></b> | 4.25  | 4.00  | 4.45  | 4.10  | 4.20  | 4.31  |
| <b>MnO</b>                         | 0.11  | 0.11  | 0.11  | 0.11  | 0.12  | 0.11  |
| <b>MgO</b>                         | 2.51  | 2.34  | 2.55  | 2.48  | 2.50  | 2.47  |
| <b>CaO</b>                         | 9.77  | 9.12  | 8.38  | 8.63  | 9.78  | 9.32  |
| <b>Na<sub>2</sub>O</b>             | 0.85  | 0.94  | 0.85  | 0.85  | 0.87  | 0.86  |
| <b>K<sub>2</sub>O</b>              | 2.27  | 2.33  | 2.43  | 2.32  | 2.28  | 2.27  |
| <b>P<sub>2</sub>O<sub>5</sub></b>  | 0.18  | 0.18  | 0.20  | 0.21  | 0.16  | 0.19  |
| <b>LOI</b>                         | 16.06 | 14.57 | 14.53 | 15.59 | 16.19 | 16.19 |
| <b>Total</b>                       | 100.0 | 100.0 | 100.0 | 100.0 | 100.0 | 100.0 |

*ppm*

|           |     |     |     |     |     |     |
|-----------|-----|-----|-----|-----|-----|-----|
| <b>Ba</b> | 393 | 385 | 410 | 402 | 399 | 398 |
| <b>Ce</b> | 39  | 36  | 40  | 40  | 40  | 42  |
| <b>Co</b> | 13  | 13  | 14  | 12  | 12  | 13  |
| <b>Cr</b> | 90  | 89  | 97  | 90  | 87  | 90  |
| <b>Cu</b> | 73  | 57  | 57  | 73  | 59  | 67  |
| <b>Ga</b> | 15  | 14  | 16  | 15  | 15  | 17  |
| <b>Hf</b> | 3   | 3   | 3   | 3   | 5   | 4   |
| <b>La</b> | 12  | 9   | 15  | 10  | 13  | 15  |
| <b>Nb</b> | 12  | 11  | 12  | 12  | 11  | 12  |
| <b>Nd</b> | 26  | 18  | 23  | 23  | 18  | 23  |
| <b>Ni</b> | 66  | 61  | 65  | 62  | 61  | 62  |
| <b>Pb</b> | 32  | 33  | 34  | 37  | 27  | 32  |
| <b>Rb</b> | 95  | 100 | 106 | 100 | 93  | 98  |
| <b>Sc</b> | 9   | 8   | 9   | 8   | 10  | 10  |
| <b>Sr</b> | 295 | 279 | 273 | 269 | 294 | 289 |
| <b>Th</b> | 6   | 5   | 6   | 5   | 5   | 6   |
| <b>V</b>  | 81  | 72  | 83  | 78  | 78  | 84  |
| <b>Y</b>  | 19  | 19  | 20  | 18  | 19  | 19  |
| <b>Zn</b> | 75  | 76  | 86  | 81  | 67  | 74  |
| <b>Zr</b> | 185 | 160 | 167 | 156 | 195 | 179 |

---

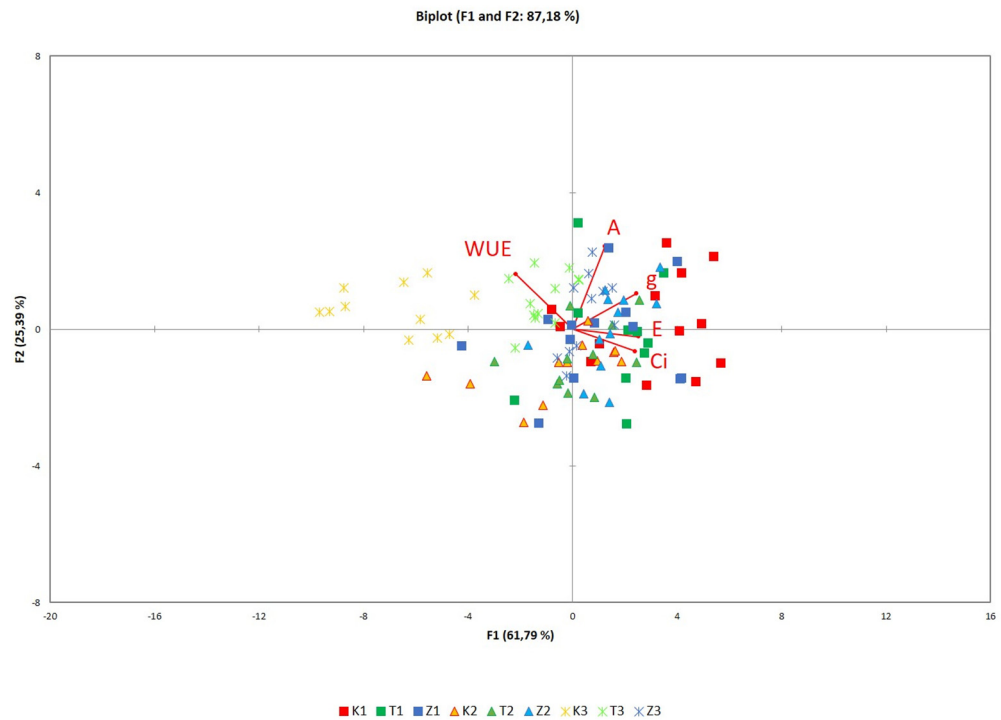

**Supplementary figure 1.** PCA of the ecophysiological parameters measured after the foliar applications of K (kaolin), Z (CHA-zeolite), and T (control).

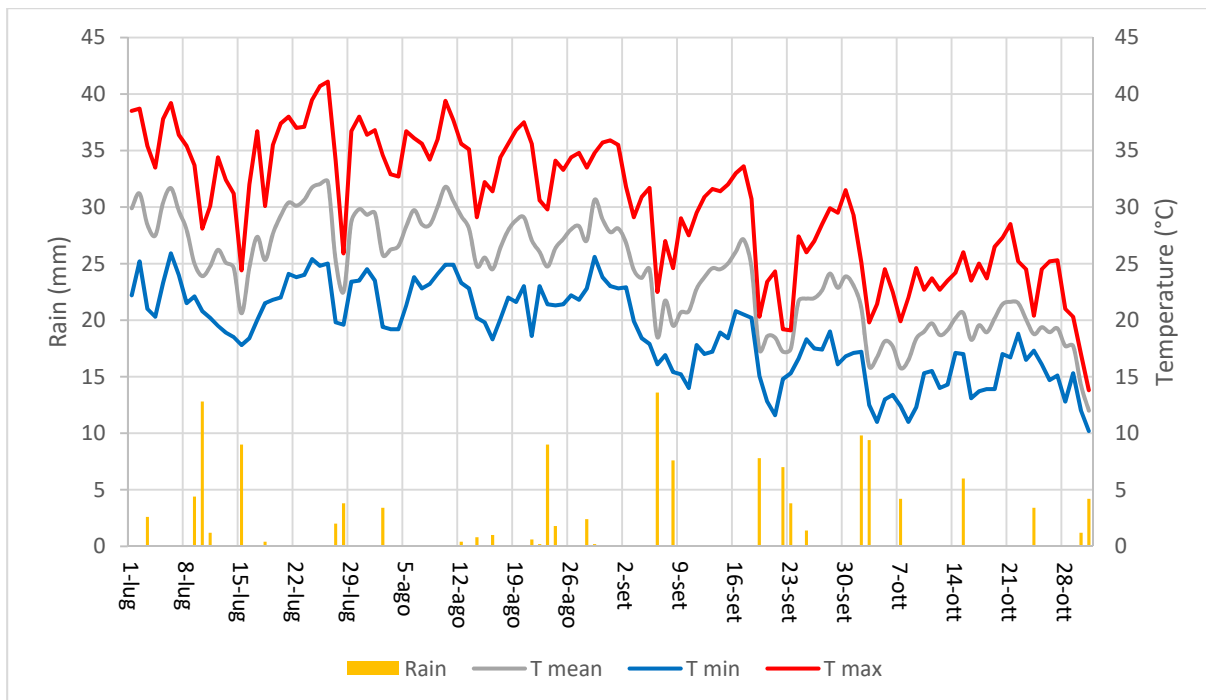

**Supplementary figure 2.** Minimum, mean and maximum temperature (°C) and rainfall (mm) recorded in the period 1<sup>st</sup> July-31<sup>st</sup> October.
